# Supplementary material
Source: PubMed Central journal article supplement (PMC3689235)
Supplement: neo1507_0720SD1.pdf [file neo1507_0720SD1.pdf]

## Supplementary Reference

- [1] Kilpinen S, Autio R, Ojala K, Iljin K, Bucher E, Sara H, Pisto T, Saarela M, Skotheim RI, Björkman M, et al. (2008). Systematic bioinformatic analysis of expression levels of 17,330 human genes across 9,783 samples from 175 types of healthy and pathological tissues. *Genome Biol* **9**, R139.

**Table W1.** Oligonucleotide Primer Sequences for 5'RACE PCR.

| Primer      | Oligonucleotide Sequence (5'→3') | Ensembl Transcript | Exon |
|-------------|----------------------------------|--------------------|------|
| ETV1_R_GSP  | GTTCTGCTGGGATGAGCCAGGAAGC        | ENST00000430479    | 10   |
| ETV1_F_IC   | TCCCTCCATCGCAGTCCATACCAGA        | ENST00000430479    | 8    |
| ETV1_R_NGSP | AAGCCTTGTTGGTGGGAAGGGGATGT       | ENST00000430479    | 9    |
| ETV4_R_GSP  | CAGGGACAACGCAGACATCATCTGG        | ENST00000319349    | 10   |
| ETV4_F_IC   | CATGGCGAGCAGTGCCTTTACTCCA        | ENST00000319349    | 6    |
| ETV4_R_NGSP | GGCGAAGTCCGCTCTGTTCTGTTTGA       | ENST00000319349    | 8    |
| ETV5_R_GSP  | CTCTCAGGCACAACACAAGTGTCTGTC      | ENST00000306376    | 10   |
| ETV5_F_IC   | CCCTTCCCTCCTCAGCCAGGAGTTC        | ENST00000306376    | 8    |
| ETV5_R_NGSP | TGGCTGCTGGAGAAATAACCCCTCT        | ENST00000306376    | 9    |

**Table W2.** Oligonucleotide Primers Used for RT-PCR.

| Primer     | Oligonucleotide Sequence (5'→3') | Ensembl Transcript | Exon |
|------------|----------------------------------|--------------------|------|
| C15orf21_S | TCTTTTGGTTGGTGATTTTGATGA         | ENST00000409454    | 1    |
| SLC45A3_S  | GGAACCAGCCTGCACGC                | ENST00000367145    | 1    |
| UBTF_S     | TTGACCCCGGGTTGCC                 | ENST00000393606    | 2    |
| TMPRSS2    | TAGGCGCGAGCTAAGCAGGAG            | ENST00000332149    | 1    |
| OR51E2_S   | ACCACCACCAGGAATTGGC              |                    |      |
| EST14_S    | GAAGAGAAGAGAATTCACAGAGTAAAA      |                    |      |
| HERVK17_S  | TTTCCACACTCTCATTCCCGGA           |                    |      |
| ETV1_AS1   | TCGTTACAATTTCTCCCACGCT           | ENST00000430479    | 4    |
| ETV1_AS2   | GCTTAAAGCCTTGTGGTGGG             | ENST00000430479    | 9    |
| ETV4_AS    | GGAGTAAAGGCACTGCTCGC             | ENST00000319349    | 6    |

**Table W3.** BAC Probes Used to Assess Genomic Rearrangements of ETS Transcription Factors and Novel 5' Fusion Partners.

| Gene Symbol               | 5' Probe (Red) | 3' Probe (Green) |
|---------------------------|----------------|------------------|
| <i>ETV1</i>               | RP11-643C13    | RP11-790J2       |
| <i>ETV4</i>               | RP11-436J4     | RP11-831F13      |
| <i>OR51E2</i>             | CTC-775N13     | NA               |
| <i>Chr14 (q13.3-21.1)</i> | RP11-945C4     | NA               |
|                           | RP11-666J24    |                  |

NA indicates not applicable.

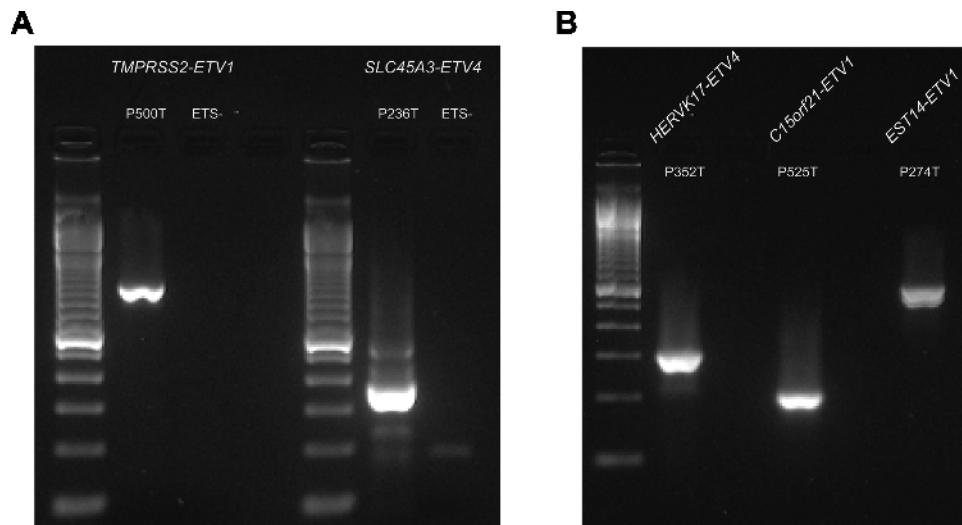

**Figure W1.** RT-PCR screening of gene fusions involving known 5' fusion partners. Detection of *TMPRSS2-ETV1* and *SLC45A3-ETV4* fusion transcripts in PCAs P500T and P236T, respectively (A). RT-PCR validation of 5'RACE findings of gene fusions involving known 5' partners (B).

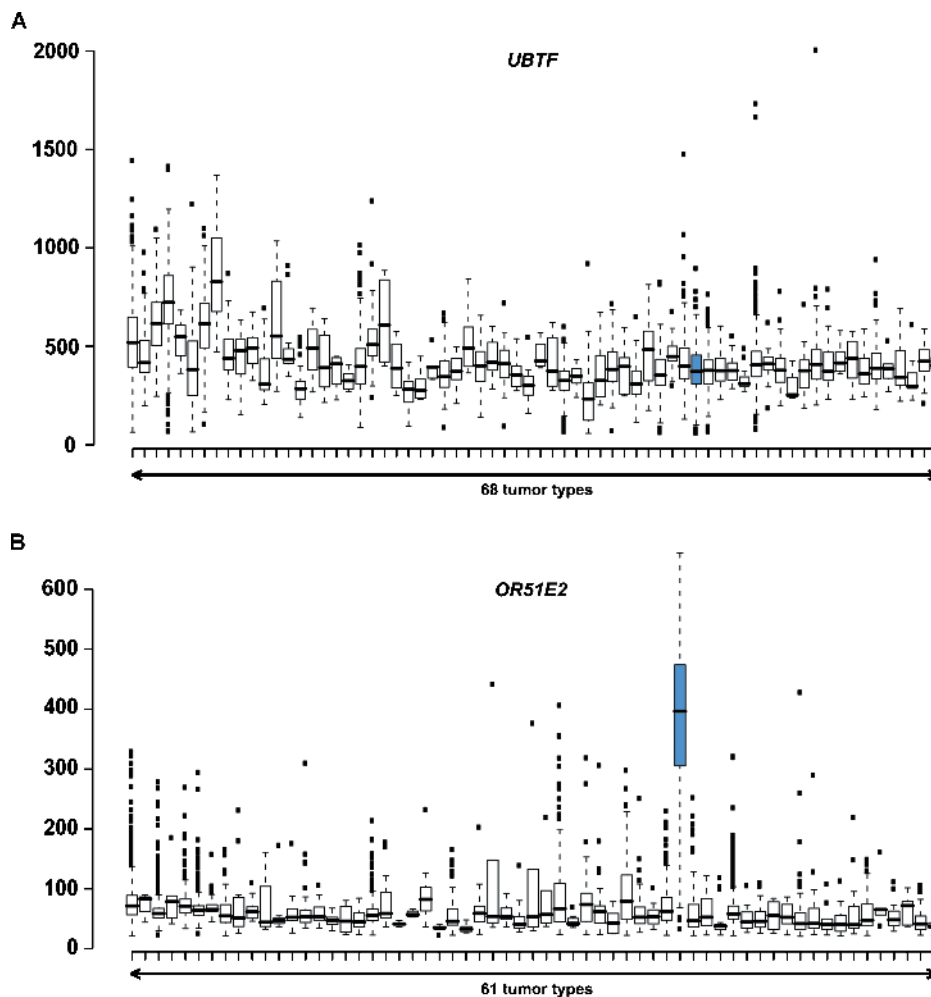

**Figure W2.** Expression of *UBTF* and *OR51E2* in different tumor types. The plots representing *UBTF* (a) and *OR51E2* expression (b), respectively, were obtained from the publicly available GeneSapiens database [1]. The blue box represents PCAs.
